# Supplementary material for: Atomically dispersed palladium-based catalysts obtained via constructing a spatial structure with high performance for lean methane combustion
Source: Royal Society of Chemistry journal article supplement (doi:10.1039/c9ta13574j), 2020-01-01
Supplement: c9ta13574j1.pdf [file c9ta13574j1.pdf]

# Atomically dispersed Pd-based catalysts via constructing spatial structure with high performance for lean methane combustion

## Supporting Information

Qiuyan Duan<sup>a</sup>, Wenzhi Li<sup>a,\*</sup>, Chenghua Zhang<sup>b,c</sup>, Song Sun<sup>d,e</sup>, Yang Pan<sup>e</sup>, Xiong Zhou<sup>c</sup>, Yang Liu<sup>a</sup>, Kun Chen<sup>a</sup>, Cunshuo Li<sup>a</sup>, Xianzhou Wang<sup>b</sup>.

<sup>a</sup> Laboratory of Basic Research in Biomass Conversion and Utilization, Department of Thermal Science and Energy Engineering, University of Science and Technology of China, Hefei, Anhui 230026, PR China

<sup>b</sup> State Key Lab Coal Conversion, Institute of Coal Chemistry, Chinese Academy of Sciences, Taiyuan, Shanxi 030001, PR China

<sup>c</sup> Synfuels China Technology Co Ltd, SynCat Beijing, Beijing 101407, PR China

<sup>d</sup> School of Chemistry and Chemical Engineering, Anhui University, Hefei, Anhui 230601, PR China

<sup>e</sup> National Synchrotron Radiation Laboratory, University of Science and Technology of China, Hefei, Anhui 230029, PR China

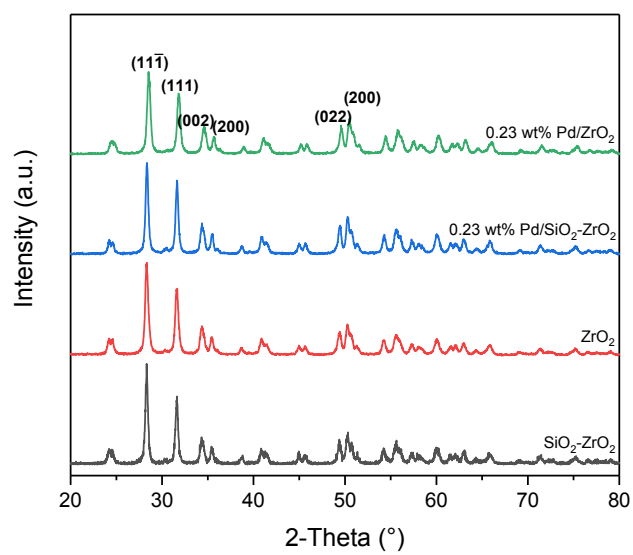

Supplementary Figure 1. XRD patterns of the as-prepared samples

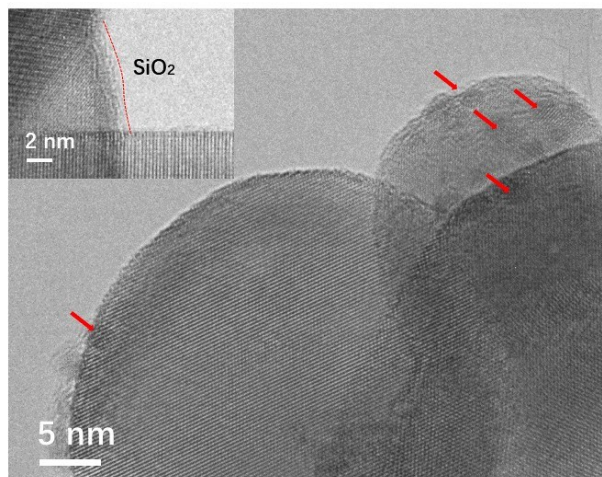

Supplementary Figure 2. TEM image of 0.23 wt% Pd/SiO<sub>2</sub>(cal)-ZrO<sub>2</sub> catalyst.

The modified support was calcined at 500 ° C in air for 3 hours, and then loaded with 0.23 wt% palladium. The catalyst was marked as 0.23 wt% Pd/SiO<sub>2</sub>(cal)-ZrO<sub>2</sub> catalyst. Amorphous silica was coated on the surface of zirconia. It was obvious that palladium species were in the form of nanoparticles.

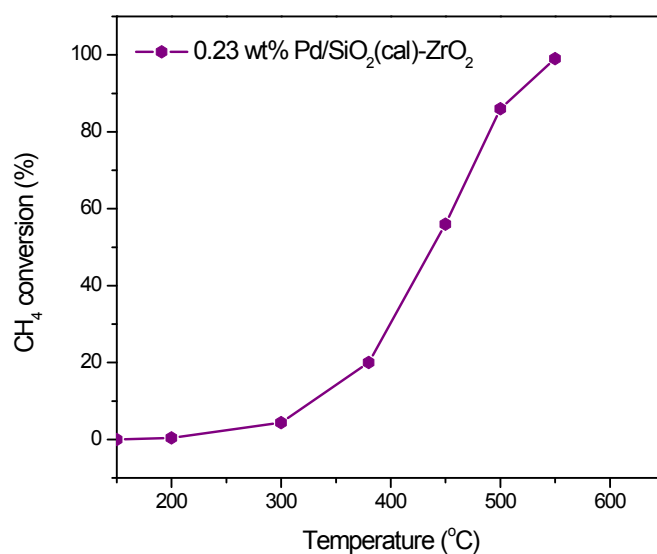

Supplementary Figure 3. Methane conversion as the function as temperature over 0.23 wt% Pd/SiO<sub>2</sub>(cal)-ZrO<sub>2</sub> catalyst. Reaction gas: 1 vol% CH<sub>4</sub>+99 vol% Air; GHSV: 30,000 ml/h<sup>-1</sup>. g<sup>-1</sup>.

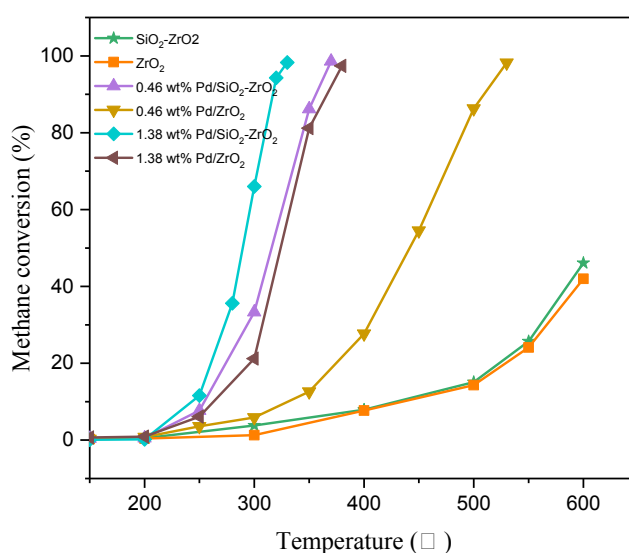

Supplementary Figure 4. Methane conversion as the function as temperature over other catalysts

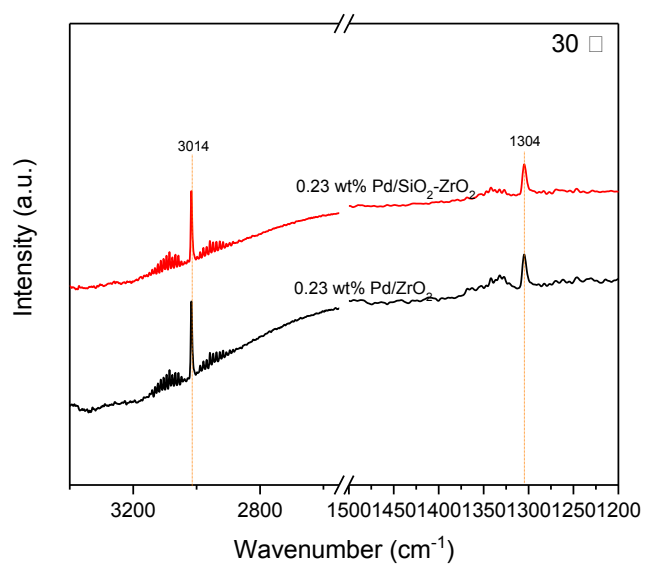

Supplementary Figure 5. In situ DRIFTS spectra of 0.23 wt% Pd/SiO<sub>2</sub>-ZrO<sub>2</sub> catalyst and 0.23 wt% Pd/ZrO<sub>2</sub> catalyst in the presence of 1% CH<sub>4</sub>/Air at room temperature.

Supplementary Table 1. Summarized nitrogen adsorption/desorption data and actual palladium and silicon loadings of various catalysts.

| Pd loading amount (wt %) | SiO <sub>2</sub> -ZrO <sub>2</sub> supported |                                |                                      |                                                  | ZrO <sub>2</sub> supported     |                                      |                                                  |
|--------------------------|----------------------------------------------|--------------------------------|--------------------------------------|--------------------------------------------------|--------------------------------|--------------------------------------|--------------------------------------------------|
|                          | Si <sup>a</sup> loading (wt %)               | Pd <sup>a</sup> loading (wt %) | S <sub>BET</sub> (m <sup>2</sup> /g) | V <sub>p</sub> <sup>b</sup> (cm <sup>3</sup> /g) | Pd <sup>a</sup> loading (wt %) | S <sub>BET</sub> (m <sup>2</sup> /g) | V <sub>p</sub> <sup>b</sup> (cm <sup>3</sup> /g) |
| 0                        | 4.512                                        | 0                              | 27.53                                | 0.247                                            | 0                              | 27.41                                | 0.189                                            |
| 0.23                     | 4.492                                        | 0.213                          | 29.78                                | 0.250                                            | 0.215                          | 28.42                                | 0.243                                            |
| 0.46                     | 4.498                                        | 0.441                          | 30.05                                | 0.243                                            | 0.439                          | 28.70                                | 0.235                                            |
| 1.38                     | 4.489                                        | 1.355                          | 31.60                                | 0.264                                            | 1.362                          | 27.33                                | 0.226                                            |

<sup>a</sup>Data were determined by the ICP-AES technique.

<sup>b</sup>Data were obtained from BJH Adsorption cumulative volume of pores between 17.000 Å and 3,000.000 Å diameter.

Supplementary Table 2. Performance comparison of various Palladium-based catalysts for lean methane combustion.

| Sample                                                   | WHSV<br>(ml/g-1.h-1) | T50<br>(°C) | T90<br>(°C) | T100<br>(°C) | Reactant gas                                                | References |
|----------------------------------------------------------|----------------------|-------------|-------------|--------------|-------------------------------------------------------------|------------|
| Pd5/MgAlO <sub>2</sub>                                   | 20,000               |             | 477         |              | CH <sub>4</sub> (1%)/Air                                    | [1]        |
| Pd2/LaFeO <sub>3</sub>                                   | 18,400               |             | 460         |              | CH <sub>4</sub> (1%)/O <sub>2</sub> (4.4%)/He               | [2]        |
| Pd@CeO <sub>2</sub> /H-Al <sub>2</sub> O <sub>3</sub>    | 200,000              |             |             | 400          | CH <sub>4</sub> (0.5%)/O <sub>2</sub> (2%)/Ar               | [3]        |
| Pd0.5/g-Al <sub>2</sub> O <sub>3</sub>                   | 120,000              |             | 563         |              | CH <sub>4</sub> (1%)/O <sub>2</sub> (20%)/N <sub>2</sub>    | [4]        |
| Pd1/CeO <sub>2</sub> /PG151                              | 30,000               |             |             | 350          | CH <sub>4</sub> (1%)/O <sub>2</sub> (18%)/N <sub>2</sub>    | [5]        |
| Pd0.8/Co0.2                                              | 40,000               | 300         | 370         |              | CH <sub>4</sub> (0.5%)/O <sub>2</sub> (2%)/Ar               | [6]        |
| LaAlPd-H-900                                             | 15,000               |             | 368         |              | CH <sub>4</sub> (1%)/O <sub>2</sub> (20%)/Ar                | [7]        |
| Pd/Na-MOR                                                | 70,000               |             |             | 450          | CH <sub>4</sub> (1%)/O <sub>2</sub> (4%)/N <sub>2</sub>     | [8]        |
| Pd/o-CeO <sub>2</sub>                                    | 30,000               |             | 348         |              | CH <sub>4</sub> (1%)/Air                                    | [9]        |
| Pd/NA-Al <sub>2</sub> O <sub>3</sub>                     | 15,000               |             |             | 370          | CH <sub>4</sub> (1%)/O <sub>2</sub> (20%)/Ar                | [10]       |
| Pd0.8Ni0.2@S-1                                           | 24,000               |             | 360         |              | CH <sub>4</sub> (1%)/ O <sub>2</sub> (20%) / N <sub>2</sub> | [11]       |
| Pd6/CeO <sub>2</sub> -0.1/Co <sub>3</sub> O <sub>4</sub> | 60,000               |             | 350         |              | CH <sub>4</sub> (0.5%)/O <sub>2</sub> (2%)/He               | [12]       |
| Pd@CeO <sub>2</sub> /Si-Al <sub>2</sub> O <sub>3</sub>   | 50,000               | 368         | 416         |              | CH <sub>4</sub> (1%)/ O <sub>2</sub> (20%) / N <sub>2</sub> | [13]       |
| 6LSCPd                                                   | 24,000               |             | 580         |              | CH <sub>4</sub> (1%)/ O <sub>2</sub> (6%) /CO(6)/ He        | [14]       |
| Pd/6P-OMA                                                | 30,000               |             |             | 345          | CH <sub>4</sub> (1%)/ O <sub>2</sub> (5%) / N <sub>2</sub>  | [15]       |
| Pd-NiCo <sub>2</sub> O <sub>4</sub> /SiO <sub>2</sub>    | 30,000               |             |             | 378          | CH <sub>4</sub> (1%)/Air                                    | [16]       |
| Pd/CeZr5                                                 | 60,000               |             |             | 500          | CH <sub>4</sub> (1%)/O <sub>2</sub> (4%)/He                 | [17]       |
| Pd/15TA                                                  | 50,000               |             | 340         |              | CH <sub>4</sub> (1%)/ O <sub>2</sub> (10%) / N <sub>2</sub> | [18]       |
| Pd/ADP-OMA                                               | 50,000               |             | 420         |              | CH <sub>4</sub> (1%)/ O <sub>2</sub> (5%) / N <sub>2</sub>  | [19]       |
| PdCo/Hal                                                 | 72,000               |             |             | 420          | CH <sub>4</sub> (1%)/ O <sub>2</sub> (20%) / Ar             | [20]       |
| Pd-CeO <sub>2</sub> CASs/Al <sub>2</sub> O <sub>3</sub>  | 60,000               |             |             | 410          | CH <sub>4</sub> (1%)/ O <sub>2</sub> (4%) / N <sub>2</sub>  | [21]       |
| <b>Pd1.38/SiO<sub>2</sub>-ZrO<sub>2</sub></b>            | <b>30,000</b>        |             |             | <b>330</b>   | <b>CH<sub>4</sub>(1%)/Air</b>                               | This work  |

## Reference

- [1] S. Tanasoi, G. Mitran, N. Tanchoux, T. Cacciaguerra, F. Fajula, I. Săndulescu, D. Tichit, I. C. Marcu, *Appl. Catal. A-Gen.*, 2011, 395, 78-86.
- [2] A. Eyssler, A. Winkler, P. Mandaliev, P. Hug, A. Weidenkaff, D. Ferri, *Appl. Catal. B-Environ.*, 2011, 106, 494-502.
- [3] M. Cargnello, J. J. Delgado Jaén, J. C. Hernández Gar rido, K. Bakhmutsky, T. Montini, J. J. Calvino Gámez, R. J. Gorte, P. Fornasiero, *Science*, 2012, 337, 713-717.
- [4] J. H. Park, J. H. Cho, Y. J. Kim, E. S. Kim, H. S. Han, C. H. Shin, *Appl. Catal. B-Environ.*, 2014, 160, 135-143.
- [5] M. Hoffmann, S. Kreft, G. Georgi, G. Fulda, M. M. Pohl, D. Seeburg, C. B-Karin, E. V. Kondratenko, S. Wohlrab, *Appl. Catal. B-Environ.*, 2015, 179, 313-320.
- [6] J. J. Willis, E. D. Goodman, L. H. Wu, A. R. Riscoe, P. Martins, C. J. Tassone, M. Cargnello, *J. Am. Chem. Soc.*, 2017, 139, 11989-11997.
- [7] X. W. Yang, Q. Gao, Z. Y. Zhao, Y. L. Guo, Y. Guo, L. Wang, Y. S. Wang, W. C. Zhan, *Appl. Catal. B-Environ.*, 2018, 239, 373-382.
- [8] A. W. Petrov, D. Ferri, F. Krumeich, M. Nachttegaal, J. A. Bokhoven, O. Kröcher, *Nat. commun.*, 2018, 9, 2545.
- [9] Y. Y. Lei, W. Z. Li, Q. C. Liu, Q. Z. Lin, X. S. Zheng, Q. F. Huang, S. N. Guan, X. H. Wang, C. X. Wang, F. Y. Li, *Fuel*, 2018, 233, 10-20.
- [10] X. W. Yang, Q. Li, E. Lu, Z. Q. Wang, X. Q. Gong, Z. Y. Yu, Y. Guo, L. Wang, Y. L. Guo, W. C. Zhan, J. S. Zhang, S. Dai, *Nat. commun.*, 2019, 10, 1611.
- [11] Z. S. Zhang, L. W. Sun, X. F. Hu, Y. B. Zhang, H. Y. Tian, X. G. Yang, *Appl. Surf. Sci.*, 2019, 494, 1044-1054.
- [12] W. Li, D. P. Liu, X. L. Feng, Z. Zhang, X. Jin, Y. Zhang, *Adv. Energy. Mater.*, 2019, 9, 1803583.
- [13] D. Pi, W. Z. Li, Q. Z. Lin, Q. F. Huang, H. Q. Hu, C. Y. Shao, *Energy Technol.*, 2016, 4, 943-949.
- [14] Y. Farhang, E. T-Nassaj, M. Rezaei, *Ceram. Int.*, 2018, 44, 21499-21506.
- [15] X. H. Chen, Y. Zheng, F. Huang, Y. H. Xiao, G. H. Cai, Y. C. Zhang, Y. Zhang, L. L. Jiang, *ACS Catal.*, 2018, 8, 11016-11028.
- [16] Q. F. Huang, W. Z. Li, Q. Z. Lin, X. S. Zheng, H. B. Pan, D. Pi, C. Y. Shao, C. Hu, H. T. Zhang, *J. Energy Institute*, 2018, 91, 733-742.
- [17] I. B. Saïd, K. Sadouki, S. Masse, T. Coradin, L. S. Smiri, S. Fessi, *Microporous Mesoporous Mater.*, 2018, 260, 93-101.
- [18] B. X. Chen, J. Lin, X. H. Chen, Y. L. Chen, Y. L. Xu, Z. X. Wang, W. Zhang, Y. Zheng, *ACS omega*, 2019, 4, 18582-18592.
- [19] X. H. Chen, Y. Zheng, Y. L. Chen, Y. L. Xu, F. L. Zhong, W. Zhang, Y. H. Xiao, Y. Zheng, *Int. J. Hydrogen Energy.*, 2019, 44, 27772-27783.
- [20] Y. H. Ahmad, A. T. Mohamed, K. A. Mahmoud, A. S. Aljaber, S. Y. Al-Qaradawi, *RSC Adv.*, 2019, 9, 32928-32935.
- [21] X. W. Yang, C. H. Du, Y. L. Guo, Y. Guo, L. Wang, Y. S. Wang, W. C. Zhan, *J. Rare Earths*, 2019, 37, 714-719.
